# Supplementary material
Source: PubMed Central journal article supplement (PMC3436133)
Supplement: supp_M112.341917_jbc.M112.341917-1.pdf [file supp_M112.341917_jbc.M112.341917-1.pdf]

## Supplementary Figures

**Figure S1.** Microarray analysis of M21 and M21L cells grown in 2D and 3D-collagen tissue culture. Microarray data was analysed as for Figure 1. The following table shows the genes that constitute each microarray data category. Numbers are GCRMA-normalized log<sub>2</sub> expression values of biological triplicates (three separate experiments) for each condition. Each of the eight tables corresponds to one of the expression patterns in figure 1 A. The background colour of the gene symbol column corresponds to the colour-code of the pattern in figure 1 A. The background colours of first row of a table also shows the gene expression pattern with red indicating high relative expression and green low relative expression (similar to figure 1 A).

| Pattern 1 | M21L (av-) |       |      |      |      |      | M21 (av+) |      |      |      |      |      |
|-----------|------------|-------|------|------|------|------|-----------|------|------|------|------|------|
|           | 2D         |       |      | 3D   |      |      | 2D        |      |      | 3D   |      |      |
| MAPRE1    | 10.06      | 10.33 | 9.98 | 9.63 | 9.57 | 9.55 | 9.27      | 9.33 | 9.40 | 8.71 | 8.82 | 8.44 |
| ATP1B1    | 8.74       | 8.58  | 8.79 | 7.36 | 7.08 | 7.25 | 7.83      | 7.68 | 7.93 | 4.50 | 4.63 | 4.63 |
| RAB32     | 7.47       | 7.24  | 7.54 | 6.21 | 6.62 | 6.40 | 6.45      | 6.49 | 6.74 | 5.12 | 5.41 | 5.40 |
| MICALL1   | 5.42       | 5.51  | 5.72 | 4.55 | 4.83 | 4.93 | 4.68      | 4.90 | 4.88 | 4.03 | 3.88 | 3.92 |
| FYN       | 8.02       | 8.37  | 8.06 | 7.59 | 7.45 | 7.26 | 6.06      | 6.51 | 6.56 | 5.83 | 5.53 | 5.58 |
| ADRBK2    | 3.92       | 3.67  | 3.95 | 3.44 | 3.34 | 3.30 | 3.01      | 2.96 | 3.08 | 2.69 | 2.77 | 2.77 |
| SOHLH2    | 8.91       | 8.83  | 8.68 | 8.15 | 8.14 | 8.41 | 7.56      | 7.63 | 7.78 | 7.40 | 7.41 | 7.32 |
| PDE4DIP   | 7.92       | 8.41  | 7.64 | 7.04 | 7.39 | 6.61 | 5.85      | 5.81 | 6.26 | 4.72 | 4.78 | 4.67 |
| KIF3C     | 5.11       | 5.12  | 5.27 | 4.17 | 4.13 | 4.15 | 4.23      | 4.44 | 4.59 | 3.45 | 3.50 | 3.40 |
| CAP2      | 7.49       | 7.33  | 7.08 | 6.33 | 6.27 | 5.93 | 5.75      | 6.26 | 5.91 | 4.78 | 4.79 | 4.49 |
| DBN1      | 6.30       | 6.27  | 6.10 | 5.65 | 5.63 | 5.52 | 5.11      | 5.12 | 5.32 | 4.90 | 5.16 | 5.01 |
| GSS       | 8.49       | 8.60  | 8.90 | 6.83 | 6.78 | 6.23 | 7.70      | 7.64 | 7.63 | 6.36 | 6.37 | 5.78 |
| TRAK2     | 7.82       | 7.89  | 7.65 | 4.00 | 4.51 | 3.60 | 6.71      | 6.81 | 6.37 | 3.68 | 3.62 | 3.44 |
| ADAM23    | 4.83       | 5.63  | 5.01 | 3.41 | 3.64 | 3.38 | 3.64      | 3.61 | 3.63 | 2.61 | 2.83 | 2.92 |

|                  |                   |       |       |           |       |       |                  |       |       |           |       |       |
|------------------|-------------------|-------|-------|-----------|-------|-------|------------------|-------|-------|-----------|-------|-------|
| PREP             | 6.50              | 6.63  | 6.86  | 5.70      | 5.32  | 5.72  | 4.83             | 4.88  | 5.13  | 4.36      | 4.10  | 4.13  |
| G6PD             | 6.95              | 7.13  | 7.08  | 6.04      | 5.75  | 5.76  | 5.84             | 5.61  | 5.74  | 4.95      | 4.92  | 4.87  |
| MICALL1          | 7.40              | 7.25  | 6.99  | 5.59      | 5.29  | 5.34  | 5.65             | 5.81  | 6.05  | 4.98      | 4.51  | 4.47  |
| SYK              | 5.47              | 5.25  | 5.16  | 3.98      | 3.48  | 3.79  | 3.74             | 4.19  | 3.88  | 3.15      | 3.04  | 3.29  |
| RNGTT            | 5.76              | 5.90  | 5.38  | 4.04      | 3.84  | 3.80  | 4.33             | 4.59  | 4.54  | 3.79      | 3.88  | 3.96  |
| PLAT             | 8.35              | 8.81  | 8.76  | 5.54      | 5.34  | 5.29  | 6.83             | 6.46  | 7.34  | 5.36      | 4.48  | 4.24  |
| MBP              | 6.25              | 6.15  | 6.50  | 4.42      | 4.61  | 4.60  | 4.47             | 4.62  | 4.78  | 4.42      | 3.80  | 4.10  |
|                  | <b>M21L (av-)</b> |       |       |           |       |       | <b>M21 (av+)</b> |       |       |           |       |       |
| <b>Pattern 2</b> | <b>2D</b>         |       |       | <b>3D</b> |       |       | <b>2D</b>        |       |       | <b>3D</b> |       |       |
| CDIPT            | 11.11             | 11.09 | 11.05 | 11.30     | 11.38 | 11.48 | 10.68            | 10.68 | 10.59 | 11.13     | 11.06 | 11.07 |
| SLC35A1          | 7.14              | 7.72  | 7.57  | 8.45      | 8.14  | 8.58  | 6.07             | 5.77  | 5.77  | 7.61      | 7.27  | 7.36  |
| PLP1             | 10.78             | 11.03 | 10.81 | 11.25     | 11.45 | 11.58 | 10.46            | 10.69 | 10.33 | 9.99      | 9.98  | 9.91  |
| MAPK9            | 3.91              | 4.00  | 4.06  | 4.23      | 4.26  | 4.45  | 3.43             | 3.44  | 3.46  | 3.69      | 3.56  | 3.62  |
| SOX4             | 7.91              | 8.15  | 8.56  | 10.07     | 9.68  | 9.86  | 7.55             | 7.78  | 7.37  | 9.34      | 9.00  | 9.20  |
| NA               | 7.35              | 7.52  | 7.58  | 8.28      | 8.21  | 8.07  | 6.65             | 6.43  | 6.33  | 6.92      | 7.33  | 7.14  |
| C2orf72          | 2.61              | 2.65  | 2.62  | 3.07      | 3.12  | 3.05  | 2.49             | 2.55  | 2.35  | 2.67      | 2.71  | 2.72  |
| SAT1             | 10.55             | 10.75 | 11.08 | 11.69     | 12.12 | 12.19 | 9.47             | 9.83  | 9.24  | 11.00     | 11.09 | 11.01 |
| POLI             | 6.25              | 6.93  | 6.73  | 8.19      | 8.27  | 8.04  | 4.95             | 5.09  | 4.37  | 7.06      | 7.21  | 6.88  |
| GSTT2            | 5.04              | 5.21  | 5.23  | 6.38      | 5.45  | 6.41  | 2.67             | 2.74  | 2.89  | 4.10      | 4.11  | 3.64  |
| CHKB             | 5.18              | 4.99  | 4.71  | 5.72      | 5.64  | 5.73  | 3.81             | 3.97  | 3.94  | 4.19      | 4.21  | 4.42  |
| PHLPP1           | 5.51              | 5.77  | 6.08  | 8.06      | 7.99  | 7.72  | 4.83             | 5.11  | 5.42  | 7.32      | 7.11  | 6.58  |
| NA               | 3.61              | 3.54  | 3.37  | 7.42      | 7.88  | 7.50  | 3.37             | 3.32  | 3.57  | 6.71      | 6.23  | 6.94  |
| CPNE1            | 8.47              | 8.51  | 8.18  | 9.20      | 9.39  | 9.09  | 7.64             | 7.54  | 7.67  | 8.36      | 8.13  | 8.13  |
| SETBP1           | 4.62              | 4.40  | 4.57  | 5.30      | 5.25  | 5.46  | 3.66             | 3.27  | 3.83  | 3.62      | 3.59  | 3.56  |
| TMEM47           | 5.79              | 6.80  | 6.39  | 7.59      | 7.72  | 7.90  | 2.01             | 2.16  | 2.56  | 2.83      | 2.74  | 3.17  |
| RP6-213H19.1     | 9.47              | 9.13  | 9.43  | 10.98     | 10.84 | 11.13 | 8.70             | 8.91  | 9.11  | 9.88      | 9.88  | 9.98  |
| CPE              | 6.18              | 7.12  | 7.07  | 8.20      | 8.24  | 8.62  | 3.25             | 3.53  | 2.76  | 3.82      | 3.62  | 4.70  |
| CLK4             | 5.14              | 5.85  | 5.69  | 8.42      | 8.09  | 8.24  | 4.74             | 4.92  | 4.65  | 6.86      | 7.15  | 6.82  |
| GLUL             | 9.14              | 9.40  | 9.06  | 10.22     | 10.13 | 10.09 | 8.58             | 8.64  | 8.88  | 9.08      | 8.81  | 9.06  |
| F2R              | 3.74              | 3.46  | 3.37  | 5.03      | 4.56  | 4.77  | 2.67             | 2.70  | 2.53  | 2.95      | 2.93  | 2.58  |
| PMM1             | 5.49              | 5.57  | 5.49  | 6.67      | 6.81  | 6.64  | 4.94             | 4.94  | 5.21  | 5.48      | 5.60  | 5.64  |

|                  |                   |       |       |           |       |       |                  |       |       |           |       |       |
|------------------|-------------------|-------|-------|-----------|-------|-------|------------------|-------|-------|-----------|-------|-------|
| APBB2            | 3.67              | 4.32  | 3.94  | 7.65      | 7.95  | 7.82  | 3.85             | 4.19  | 4.08  | 6.30      | 5.68  | 6.49  |
| AZGP1            | 4.02              | 4.48  | 4.15  | 6.20      | 5.92  | 5.74  | 3.73             | 3.64  | 3.21  | 3.93      | 4.11  | 4.16  |
| CPE              | 4.75              | 5.14  | 5.87  | 7.68      | 7.32  | 7.96  | 4.01             | 3.88  | 3.63  | 4.00      | 3.62  | 4.01  |
| APBB2            | 3.55              | 3.54  | 4.16  | 5.96      | 5.92  | 5.91  | 3.85             | 4.02  | 3.75  | 4.24      | 4.28  | 4.18  |
| CDIPT            | 11.11             | 11.09 | 11.05 | 11.30     | 11.38 | 11.48 | 10.68            | 10.68 | 10.59 | 11.13     | 11.06 | 11.07 |
| SLC35A1          | 7.14              | 7.72  | 7.57  | 8.45      | 8.14  | 8.58  | 6.07             | 5.77  | 5.77  | 7.61      | 7.27  | 7.36  |
| PLP1             | 10.78             | 11.03 | 10.81 | 11.25     | 11.45 | 11.58 | 10.46            | 10.69 | 10.33 | 9.99      | 9.98  | 9.91  |
| MAPK9            | 3.91              | 4.00  | 4.06  | 4.23      | 4.26  | 4.45  | 3.43             | 3.44  | 3.46  | 3.69      | 3.56  | 3.62  |
|                  | <b>M21L (av-)</b> |       |       |           |       |       | <b>M21 (av+)</b> |       |       |           |       |       |
| <b>Pattern 3</b> | <b>2D</b>         |       |       | <b>3D</b> |       |       | <b>2D</b>        |       |       | <b>3D</b> |       |       |
| GJB1             | 9.29              | 9.36  | 9.35  | 8.64      | 8.58  | 8.38  | 9.62             | 9.86  | 9.98  | 9.36      | 9.42  | 9.34  |
| DBI              | 10.74             | 10.44 | 10.90 | 9.46      | 9.56  | 9.30  | 11.11            | 11.03 | 11.42 | 10.09     | 10.08 | 10.01 |
| NA               | 12.45             | 12.36 | 12.56 | 12.09     | 12.17 | 12.11 | 12.71            | 12.79 | 12.70 | 12.20     | 12.21 | 12.11 |
| CSF2RA           | 4.40              | 4.77  | 4.62  | 2.76      | 3.18  | 3.36  | 7.34             | 7.24  | 6.71  | 6.56      | 6.24  | 5.67  |
| USP13            | 6.44              | 6.13  | 6.27  | 6.03      | 5.48  | 5.52  | 8.47             | 8.50  | 8.03  | 7.48      | 7.84  | 7.20  |
| NEDD9            | 6.00              | 6.90  | 6.06  | 4.82      | 4.90  | 5.06  | 8.20             | 8.22  | 7.85  | 7.16      | 7.24  | 6.98  |
| RAB31            | 4.63              | 4.83  | 4.85  | 4.14      | 3.94  | 3.95  | 5.12             | 5.34  | 5.42  | 4.23      | 4.18  | 4.06  |
| PRKCB            | 2.71              | 2.91  | 2.68  | 2.63      | 2.62  | 2.93  | 6.21             | 7.59  | 6.54  | 3.54      | 3.59  | 3.49  |
| C21orf91         | 4.75              | 4.59  | 4.84  | 3.30      | 3.76  | 3.63  | 5.68             | 5.61  | 5.53  | 4.34      | 4.21  | 3.81  |
| MPDZ             | 7.50              | 7.41  | 7.55  | 7.04      | 7.01  | 7.13  | 8.14             | 8.01  | 8.14  | 7.40      | 7.33  | 7.58  |
| RAB27A           | 8.94              | 8.47  | 8.69  | 6.60      | 6.99  | 6.44  | 9.50             | 9.56  | 10.22 | 7.00      | 6.47  | 6.20  |
| CLDN14           | 5.66              | 5.70  | 5.76  | 5.32      | 5.33  | 5.20  | 7.45             | 7.08  | 7.45  | 6.44      | 6.64  | 6.47  |
| CREM             | 7.70              | 7.51  | 7.12  | 5.71      | 5.51  | 6.14  | 8.50             | 8.72  | 8.44  | 7.06      | 6.72  | 6.86  |
| PTP4A2           | 7.29              | 7.15  | 7.13  | 6.95      | 6.45  | 6.80  | 8.98             | 9.26  | 9.37  | 8.29      | 8.04  | 8.38  |
| CMTM6            | 9.70              | 9.63  | 9.59  | 8.84      | 8.44  | 8.41  | 10.58            | 10.98 | 10.76 | 9.73      | 9.35  | 9.66  |
| MDH1             | 11.15             | 10.97 | 11.18 | 10.39     | 10.61 | 10.48 | 11.70            | 11.86 | 11.92 | 10.99     | 10.78 | 10.76 |
| CASP1            | 6.05              | 6.90  | 6.81  | 4.63      | 4.55  | 4.73  | 9.71             | 9.16  | 9.29  | 8.25      | 8.58  | 7.10  |
| LXN              | 8.96              | 7.96  | 8.45  | 6.62      | 5.92  | 6.17  | 9.75             | 9.74  | 10.03 | 6.48      | 6.32  | 5.98  |
| SLC45A2          | 2.55              | 2.38  | 2.41  | 1.97      | 2.12  | 2.10  | 4.66             | 5.34  | 5.65  | 3.15      | 2.75  | 2.71  |
| CASP1            | 7.09              | 7.90  | 8.12  | 5.28      | 6.09  | 5.54  | 11.27            | 11.05 | 10.85 | 9.46      | 9.81  | 8.32  |
| CASP1            | 7.00              | 7.46  | 7.30  | 5.64      | 5.29  | 5.43  | 11.11            | 10.65 | 11.09 | 9.03      | 9.46  | 7.96  |

|                  |                   |      |      |           |       |       |                  |       |       |           |       |       |
|------------------|-------------------|------|------|-----------|-------|-------|------------------|-------|-------|-----------|-------|-------|
| CASP1            | 6.97              | 7.71 | 8.19 | 5.39      | 5.25  | 5.47  | 11.14            | 10.88 | 10.95 | 9.04      | 9.51  | 8.67  |
| DAB2             | 3.98              | 4.53 | 3.84 | 3.54      | 3.64  | 3.54  | 5.99             | 5.67  | 5.73  | 4.43      | 4.23  | 4.24  |
| COL4A2           | 3.85              | 4.08 | 4.40 | 3.11      | 3.35  | 3.69  | 5.68             | 5.80  | 5.78  | 4.15      | 3.95  | 3.69  |
| SLC45A2          | 3.14              | 2.88 | 2.89 | 2.95      | 3.21  | 3.12  | 6.24             | 5.84  | 6.44  | 3.98      | 4.04  | 3.70  |
| COL4A1           | 4.11              | 3.96 | 3.90 | 3.89      | 3.79  | 4.13  | 5.24             | 5.22  | 5.23  | 4.12      | 4.24  | 4.25  |
|                  |                   |      |      |           |       |       |                  |       |       |           |       |       |
|                  | <b>M21L (av-)</b> |      |      |           |       |       | <b>M21 (av+)</b> |       |       |           |       |       |
| <b>Pattern 4</b> | <b>2D</b>         |      |      | <b>3D</b> |       |       | <b>2D</b>        |       |       | <b>3D</b> |       |       |
| ARHGAP15         | 3.36              | 3.36 | 3.54 | 4.76      | 4.68  | 4.55  | 3.61             | 3.73  | 3.49  | 5.44      | 5.22  | 4.83  |
| MAN2C1           | 3.53              | 3.34 | 3.47 | 3.86      | 3.81  | 3.79  | 3.58             | 3.46  | 3.48  | 4.20      | 4.12  | 4.06  |
| SAV1             | 3.95              | 3.97 | 4.08 | 5.24      | 4.71  | 5.14  | 3.87             | 4.08  | 4.01  | 5.75      | 5.37  | 5.51  |
| ARMC9            | 5.46              | 5.64 | 5.74 | 7.91      | 7.81  | 7.70  | 6.36             | 6.61  | 6.23  | 8.19      | 8.32  | 9.00  |
| ARIH1            | 6.42              | 6.44 | 6.58 | 7.42      | 7.37  | 7.62  | 7.30             | 7.39  | 7.32  | 8.46      | 7.93  | 8.10  |
| SLC5A3           | 8.51              | 8.32 | 8.73 | 9.66      | 10.21 | 10.39 | 9.95             | 10.14 | 9.79  | 11.11     | 10.96 | 11.23 |
| NA               | 8.24              | 8.22 | 8.93 | 10.93     | 11.32 | 11.25 | 9.78             | 10.49 | 10.16 | 12.17     | 11.91 | 12.15 |
| PHF1             | 5.66              | 5.82 | 5.76 | 6.72      | 7.05  | 6.85  | 5.76             | 5.79  | 5.39  | 7.35      | 7.58  | 7.61  |
| GNL3             | 9.69              | 9.36 | 9.36 | 9.97      | 10.10 | 10.21 | 10.21            | 10.10 | 10.35 | 10.86     | 10.96 | 11.00 |
| SNAPC5           | 5.10              | 5.35 | 4.80 | 6.57      | 6.46  | 6.81  | 5.33             | 5.08  | 5.09  | 7.43      | 7.36  | 7.15  |
| FCF1             | 3.03              | 2.94 | 2.92 | 4.41      | 4.29  | 4.01  | 2.76             | 3.11  | 2.75  | 4.69      | 4.84  | 5.03  |
| HIST1H2AE        | 2.63              | 2.85 | 2.63 | 7.33      | 7.22  | 6.88  | 3.48             | 3.73  | 2.77  | 7.67      | 8.12  | 8.20  |
| CLASP2           | 5.22              | 5.95 | 5.56 | 7.52      | 7.19  | 7.44  | 7.03             | 7.24  | 6.61  | 8.54      | 8.36  | 8.23  |
| LUC7L3           | 9.49              | 9.50 | 9.32 | 10.36     | 10.09 | 10.15 | 9.86             | 9.93  | 9.87  | 10.97     | 10.78 | 10.72 |
| EXOSC5           | 4.88              | 4.87 | 5.36 | 6.34      | 6.34  | 6.39  | 4.82             | 4.99  | 4.94  | 6.92      | 7.58  | 6.91  |
| ARGLU1           | 8.55              | 8.81 | 8.52 | 10.02     | 9.79  | 10.07 | 9.13             | 9.29  | 9.21  | 10.55     | 10.56 | 10.99 |
| DSP              | 1.57              | 1.50 | 1.89 | 1.64      | 1.77  | 1.79  | 3.84             | 4.58  | 3.84  | 4.90      | 5.33  | 4.83  |
| AEBP1            | 3.14              | 3.31 | 3.21 | 3.18      | 3.39  | 3.34  | 4.89             | 5.26  | 4.68  | 5.63      | 5.96  | 5.62  |
| HIST1H1C         | 5.73              | 6.39 | 6.21 | 9.75      | 10.19 | 9.06  | 8.22             | 8.51  | 7.69  | 10.60     | 10.72 | 10.99 |
| HIP1             | 3.47              | 4.24 | 3.49 | 3.89      | 3.46  | 3.56  | 5.72             | 5.36  | 5.40  | 6.52      | 6.18  | 6.20  |
| CADM1            | 2.08              | 2.79 | 2.73 | 2.37      | 2.89  | 2.62  | 5.12             | 6.46  | 6.55  | 7.42      | 7.02  | 7.19  |
| NR4A2            | 4.93              | 5.37 | 5.38 | 7.59      | 8.05  | 7.33  | 6.52             | 5.92  | 5.70  | 8.74      | 8.87  | 8.39  |
| CABC1            | 3.31              | 3.40 | 3.81 | 5.32      | 5.75  | 5.61  | 4.50             | 4.55  | 4.40  | 6.75      | 6.35  | 6.39  |

|           |      |      |      |       |       |       |      |      |      |       |       |       |
|-----------|------|------|------|-------|-------|-------|------|------|------|-------|-------|-------|
| SOX9      | 3.26 | 2.97 | 2.45 | 2.43  | 2.85  | 2.78  | 7.84 | 8.48 | 7.24 | 9.49  | 8.55  | 9.31  |
| MFAP2     | 3.15 | 3.11 | 2.59 | 2.95  | 2.96  | 3.02  | 5.50 | 4.95 | 5.05 | 6.22  | 6.41  | 5.79  |
| MRPS2     | 5.70 | 5.66 | 5.76 | 6.11  | 6.23  | 6.21  | 5.52 | 5.35 | 5.46 | 6.90  | 6.73  | 6.90  |
| NA        | 7.21 | 7.49 | 7.04 | 10.61 | 11.08 | 10.49 | 8.42 | 8.65 | 7.88 | 11.75 | 11.93 | 11.94 |
| OSBPL10   | 8.96 | 8.98 | 9.10 | 10.04 | 10.21 | 10.11 | 9.02 | 9.42 | 9.13 | 10.71 | 11.01 | 10.97 |
| CHCHD7    | 4.57 | 4.08 | 4.51 | 4.63  | 4.74  | 4.54  | 5.11 | 5.09 | 5.09 | 5.97  | 5.92  | 6.00  |
| ABCB4     | 2.58 | 2.87 | 2.84 | 2.38  | 2.56  | 2.80  | 3.92 | 4.01 | 4.11 | 5.96  | 6.51  | 5.28  |
| PION      | 2.54 | 2.48 | 2.41 | 2.99  | 2.64  | 2.82  | 3.79 | 3.58 | 3.93 | 5.16  | 4.63  | 4.57  |
| NA        | 3.12 | 3.30 | 2.97 | 4.67  | 4.57  | 4.42  | 3.80 | 3.46 | 3.08 | 5.32  | 5.48  | 5.77  |
| TNS1      | 3.51 | 3.81 | 4.03 | 5.52  | 5.59  | 5.47  | 5.69 | 5.38 | 5.57 | 8.22  | 7.82  | 7.00  |
| ZNF238    | 3.48 | 3.45 | 3.67 | 4.00  | 3.80  | 4.17  | 4.12 | 4.50 | 4.29 | 5.06  | 5.24  | 5.22  |
| PION      | 2.29 | 2.50 | 2.74 | 3.13  | 2.50  | 2.44  | 3.95 | 4.13 | 4.17 | 5.77  | 5.36  | 4.94  |
| POMZP3    | 3.05 | 3.26 | 2.90 | 3.68  | 3.53  | 3.74  | 4.12 | 4.20 | 3.79 | 4.98  | 4.98  | 5.13  |
| PCGF1     | 5.01 | 5.42 | 5.22 | 5.79  | 5.91  | 5.50  | 5.98 | 6.18 | 6.13 | 7.17  | 6.95  | 7.14  |
| NA        | 4.02 | 3.63 | 3.73 | 5.14  | 5.15  | 5.41  | 4.11 | 4.29 | 4.39 | 6.15  | 6.32  | 6.31  |
| POFUT2    | 5.91 | 5.92 | 5.88 | 6.99  | 7.13  | 6.97  | 6.30 | 6.03 | 5.83 | 7.76  | 7.91  | 8.00  |
| STX12     | 4.81 | 4.94 | 4.74 | 5.65  | 5.79  | 5.58  | 5.10 | 5.58 | 5.27 | 6.64  | 6.62  | 6.63  |
| CPEB3     | 2.70 | 2.60 | 2.41 | 3.54  | 3.30  | 3.09  | 2.63 | 2.94 | 2.60 | 4.21  | 4.17  | 4.16  |
| SERTAD2   | 5.99 | 5.76 | 5.77 | 6.84  | 6.74  | 6.77  | 6.63 | 6.57 | 6.41 | 7.69  | 8.07  | 7.73  |
| TXNIP     | 4.72 | 6.16 | 5.54 | 9.62  | 9.73  | 8.92  | 4.64 | 4.83 | 5.36 | 11.06 | 10.91 | 10.47 |
| HIST1H2BF | 5.18 | 4.97 | 4.88 | 6.72  | 6.50  | 6.54  | 5.55 | 5.28 | 5.72 | 7.78  | 7.73  | 8.34  |
| PRKCA     | 4.42 | 4.18 | 4.58 | 4.34  | 3.95  | 4.21  | 5.42 | 6.06 | 5.24 | 6.87  | 6.77  | 6.62  |
| JTB       | 7.97 | 7.98 | 8.14 | 8.82  | 8.74  | 8.63  | 8.47 | 8.63 | 8.33 | 9.59  | 9.69  | 9.53  |
| PFKL      | 4.21 | 3.83 | 3.88 | 4.63  | 4.77  | 4.48  | 4.31 | 4.51 | 4.50 | 5.57  | 5.75  | 5.57  |
| DPY19L2P2 | 2.21 | 2.34 | 2.05 | 2.69  | 2.50  | 2.97  | 3.35 | 3.49 | 3.72 | 5.04  | 4.42  | 4.98  |
| N4BP2L1   | 2.75 | 2.76 | 2.74 | 3.02  | 2.54  | 2.69  | 2.95 | 2.91 | 2.81 | 6.52  | 7.41  | 7.74  |
| INSIG2    | 3.73 | 3.62 | 3.44 | 4.95  | 4.68  | 4.29  | 3.97 | 4.10 | 4.41 | 6.83  | 6.28  | 6.12  |
| CDKN1C    | 2.03 | 2.48 | 2.64 | 3.52  | 3.41  | 3.43  | 3.34 | 3.64 | 3.25 | 5.76  | 6.41  | 5.62  |
| NR4A2     | 5.71 | 6.00 | 5.92 | 8.28  | 7.65  | 7.77  | 6.57 | 6.80 | 6.11 | 9.43  | 9.54  | 9.00  |
| MED6      | 2.13 | 2.27 | 2.64 | 3.56  | 3.91  | 3.76  | 2.38 | 2.34 | 2.31 | 5.06  | 4.73  | 4.97  |
| TAF12     | 3.45 | 3.63 | 3.70 | 4.90  | 4.32  | 4.72  | 4.51 | 4.25 | 4.23 | 6.44  | 6.17  | 6.90  |

|                  |                   |       |       |           |       |       |                  |       |       |           |       |       |
|------------------|-------------------|-------|-------|-----------|-------|-------|------------------|-------|-------|-----------|-------|-------|
| CRIM1            | 3.02              | 3.50  | 3.19  | 3.97      | 3.89  | 3.76  | 4.38             | 4.25  | 4.12  | 6.40      | 5.82  | 6.73  |
| SLC16A3          | 3.00              | 3.11  | 3.15  | 3.37      | 3.38  | 2.88  | 6.26             | 5.57  | 6.97  | 8.43      | 8.43  | 7.71  |
| NA               | 4.92              | 5.07  | 5.01  | 8.75      | 8.76  | 8.70  | 6.13             | 6.12  | 5.58  | 10.26     | 10.22 | 10.23 |
| NCKIPSD          | 5.24              | 5.29  | 5.01  | 5.84      | 6.29  | 6.18  | 5.52             | 5.00  | 5.32  | 7.42      | 7.56  | 7.10  |
| NSUN5P1          | 3.84              | 4.14  | 3.88  | 4.69      | 4.35  | 4.53  | 4.59             | 4.42  | 4.25  | 5.63      | 6.04  | 5.82  |
| PDLIM1           | 3.17              | 3.36  | 3.84  | 3.64      | 3.59  | 3.64  | 6.62             | 6.78  | 6.51  | 8.62      | 8.98  | 8.42  |
| NA               | 3.76              | 3.24  | 3.70  | 5.79      | 5.49  | 5.98  | 5.00             | 5.44  | 5.74  | 8.82      | 8.28  | 8.27  |
| TPTE             | 1.85              | 2.16  | 1.99  | 2.01      | 2.09  | 2.07  | 3.32             | 3.43  | 3.32  | 4.96      | 5.18  | 5.48  |
| AMPD2            | 4.04              | 4.26  | 4.27  | 4.51      | 4.45  | 4.31  | 4.23             | 4.20  | 4.46  | 5.33      | 5.44  | 5.39  |
| FAM105A          | 2.38              | 2.53  | 2.56  | 2.26      | 2.30  | 2.41  | 3.01             | 3.48  | 2.76  | 4.82      | 4.57  | 4.54  |
| CRIM1            | 1.66              | 1.54  | 1.54  | 2.29      | 1.62  | 1.76  | 2.95             | 3.15  | 2.82  | 5.83      | 5.35  | 5.74  |
|                  | <b>M21L (av-)</b> |       |       |           |       |       | <b>M21 (av+)</b> |       |       |           |       |       |
| <b>Pattern 5</b> | <b>2D</b>         |       |       | <b>3D</b> |       |       | <b>2D</b>        |       |       | <b>3D</b> |       |       |
| IL1RAP           | 8.51              | 9.40  | 8.90  | 6.94      | 7.17  | 7.31  | 9.75             | 9.56  | 9.42  | 10.25     | 10.34 | 10.02 |
| CCND1            | 4.46              | 4.25  | 4.20  | 3.47      | 3.78  | 3.75  | 5.29             | 5.13  | 5.04  | 4.71      | 4.94  | 4.63  |
| C1orf38          | 2.62              | 2.73  | 2.72  | 2.82      | 2.84  | 2.50  | 4.51             | 4.14  | 4.88  | 4.14      | 4.25  | 4.34  |
| WIPF1            | 4.23              | 4.56  | 4.50  | 4.58      | 4.23  | 4.22  | 6.63             | 6.08  | 6.76  | 5.93      | 6.33  | 5.86  |
| TSC22D3          | 3.06              | 3.46  | 3.14  | 3.02      | 3.43  | 2.95  | 5.35             | 5.43  | 5.00  | 5.46      | 5.78  | 6.06  |
| CSF2RA           | 3.64              | 3.90  | 3.69  | 3.15      | 3.25  | 3.44  | 5.73             | 5.82  | 5.40  | 5.36      | 4.90  | 4.81  |
| CADM1            | 3.97              | 4.08  | 3.78  | 3.99      | 3.82  | 3.98  | 6.00             | 6.79  | 5.88  | 6.88      | 7.09  | 6.92  |
| FAM70A           | 7.87              | 8.57  | 8.72  | 7.25      | 6.91  | 7.56  | 11.04            | 11.05 | 10.78 | 10.35     | 10.28 | 10.32 |
| TM4SF1           | 3.23              | 2.88  | 3.59  | 3.12      | 2.74  | 3.14  | 6.45             | 7.28  | 6.86  | 7.34      | 6.88  | 6.65  |
| CHMP5            | 8.89              | 9.02  | 8.94  | 9.22      | 9.33  | 9.31  | 10.02            | 10.00 | 10.05 | 10.07     | 10.39 | 10.36 |
| NEO1             | 2.54              | 2.65  | 2.87  | 3.01      | 2.74  | 2.86  | 3.52             | 3.60  | 3.50  | 3.85      | 3.72  | 3.70  |
| TCF4             | 2.39              | 2.31  | 2.16  | 2.62      | 2.56  | 2.86  | 3.27             | 3.24  | 3.22  | 3.27      | 3.20  | 3.25  |
| TM4SF1           | 3.68              | 3.72  | 5.10  | 3.95      | 3.75  | 4.30  | 8.75             | 8.70  | 8.75  | 9.11      | 8.16  | 8.68  |
| SOX9             | 1.81              | 2.43  | 2.51  | 2.35      | 2.11  | 2.00  | 9.74             | 9.68  | 8.66  | 9.77      | 9.39  | 9.39  |
| BIN3             | 5.58              | 5.63  | 5.28  | 4.62      | 4.72  | 5.02  | 6.97             | 6.82  | 7.22  | 7.18      | 6.68  | 6.98  |
| KPNB1            | 3.42              | 3.26  | 3.33  | 2.96      | 3.12  | 3.07  | 5.06             | 5.04  | 4.51  | 4.52      | 4.91  | 5.05  |
| ITGAV            | 3.80              | 4.77  | 3.68  | 5.16      | 4.83  | 4.61  | 10.72            | 10.71 | 10.56 | 10.17     | 10.20 | 10.14 |
| MDH2             | 10.61             | 10.48 | 10.34 | 10.28     | 10.49 | 10.43 | 11.28            | 11.46 | 11.33 | 11.27     | 11.22 | 11.47 |

|                  |                   |       |       |           |       |       |                  |       |       |           |       |       |
|------------------|-------------------|-------|-------|-----------|-------|-------|------------------|-------|-------|-----------|-------|-------|
| SMARCA1          | 6.17              | 6.55  | 6.06  | 6.54      | 6.55  | 6.21  | 8.08             | 8.16  | 8.06  | 8.08      | 8.21  | 7.67  |
| KPNB1            | 4.57              | 4.81  | 4.59  | 4.11      | 4.07  | 4.19  | 6.02             | 6.03  | 5.72  | 5.93      | 5.81  | 5.89  |
|                  | <b>M21L (av-)</b> |       |       |           |       |       | <b>M21 (av+)</b> |       |       |           |       |       |
| <b>Pattern 6</b> | <b>2D</b>         |       |       | <b>3D</b> |       |       | <b>2D</b>        |       |       | <b>3D</b> |       |       |
| TAF7             | 10.35             | 10.57 | 10.45 | 11.13     | 11.03 | 10.93 | 9.45             | 9.86  | 9.53  | 10.62     | 10.65 | 10.57 |
| C20orf11         | 5.89              | 6.27  | 5.93  | 6.79      | 6.93  | 6.65  | 4.79             | 4.93  | 5.22  | 6.25      | 6.33  | 6.36  |
| PPP1R15A         | 5.57              | 6.00  | 5.81  | 6.45      | 6.40  | 6.36  | 4.87             | 4.64  | 4.68  | 6.22      | 6.20  | 5.91  |
| RPL10            | 10.40             | 10.33 | 10.40 | 11.07     | 10.87 | 11.09 | 9.77             | 9.91  | 9.72  | 10.54     | 10.60 | 10.76 |
| TOMM20           | 10.19             | 10.48 | 10.32 | 11.28     | 11.10 | 11.19 | 10.90            | 10.87 | 10.63 | 11.70     | 11.61 | 11.76 |
| DIABLO           | 7.65              | 7.62  | 7.60  | 8.15      | 8.00  | 8.17  | 7.26             | 7.41  | 7.27  | 8.58      | 8.27  | 8.26  |
| MEAF6            | 7.44              | 7.57  | 7.47  | 8.52      | 8.53  | 8.68  | 8.39             | 8.06  | 8.07  | 9.02      | 9.09  | 8.91  |
| NOTCH2NL         | 7.40              | 7.71  | 8.15  | 9.59      | 9.86  | 9.75  | 8.44             | 8.78  | 8.73  | 10.14     | 10.54 | 10.38 |
| BNIP3            | 8.45              | 7.99  | 8.13  | 10.84     | 11.21 | 10.62 | 8.99             | 8.50  | 8.21  | 11.28     | 11.73 | 11.21 |
| DVL3             | 6.38              | 6.59  | 6.25  | 7.68      | 7.51  | 7.84  | 6.21             | 5.89  | 6.12  | 7.38      | 7.12  | 7.22  |
| FANCL            | 9.21              | 9.54  | 9.46  | 11.12     | 10.77 | 11.14 | 10.53            | 10.63 | 10.19 | 11.32     | 11.09 | 11.36 |
| USP34            | 7.22              | 7.15  | 7.39  | 7.97      | 8.04  | 7.89  | 7.26             | 7.40  | 7.12  | 8.38      | 8.29  | 8.48  |
| TMEM63A          | 2.67              | 3.08  | 3.27  | 5.58      | 5.39  | 5.75  | 2.88             | 2.99  | 3.51  | 4.90      | 4.98  | 4.92  |
| GATAD1           | 3.86              | 4.64  | 4.27  | 7.14      | 6.33  | 6.49  | 3.67             | 4.14  | 4.04  | 6.95      | 7.03  | 7.43  |
| BRD1             | 5.25              | 5.83  | 5.52  | 7.11      | 7.03  | 6.87  | 5.27             | 5.29  | 5.29  | 6.67      | 6.52  | 6.28  |
| MKRN1            | 6.76              | 7.25  | 7.10  | 8.97      | 9.80  | 9.20  | 7.08             | 6.76  | 7.17  | 9.18      | 9.18  | 9.45  |
| WSB1             | 4.15              | 4.37  | 4.46  | 7.90      | 6.96  | 8.12  | 4.76             | 5.44  | 5.32  | 8.06      | 8.00  | 8.44  |
| ZDHHC17          | 5.69              | 6.02  | 5.41  | 7.74      | 7.58  | 7.57  | 6.39             | 6.53  | 6.63  | 7.71      | 7.76  | 8.19  |
| PNRC1            | 8.60              | 8.96  | 8.94  | 10.15     | 9.93  | 10.01 | 8.41             | 8.34  | 7.97  | 9.55      | 9.75  | 9.50  |
| NA               | 5.85              | 6.34  | 6.33  | 8.76      | 8.32  | 8.36  | 6.33             | 6.85  | 6.86  | 8.92      | 9.14  | 8.49  |
| GCC2             | 5.71              | 6.04  | 5.61  | 7.18      | 7.18  | 7.44  | 6.34             | 6.42  | 6.01  | 7.82      | 7.90  | 7.65  |
| SDC2             | 5.63              | 5.50  | 6.26  | 7.86      | 7.46  | 7.67  | 5.69             | 5.80  | 5.95  | 8.42      | 8.27  | 8.18  |
| HIST1H2AM        | 3.98              | 4.11  | 4.15  | 7.13      | 6.16  | 6.85  | 4.59             | 4.68  | 4.12  | 7.15      | 7.46  | 7.50  |
| TBC1D15          | 5.55              | 5.63  | 6.08  | 7.22      | 7.88  | 7.71  | 5.83             | 5.94  | 6.01  | 8.07      | 8.15  | 8.31  |
| CBX7             | 4.24              | 4.96  | 4.97  | 7.49      | 7.23  | 7.27  | 4.38             | 4.31  | 4.40  | 6.41      | 7.12  | 6.75  |
| CSAD             | 3.52              | 3.84  | 3.49  | 6.49      | 6.02  | 6.39  | 3.49             | 3.46  | 3.43  | 5.73      | 5.74  | 5.98  |
| SIDT2            | 5.24              | 4.91  | 4.89  | 7.30      | 7.44  | 7.26  | 4.68             | 4.92  | 4.75  | 6.89      | 6.64  | 6.71  |

|           |                                       |       |       |       |       |       |                                      |       |       |       |       |       |
|-----------|---------------------------------------|-------|-------|-------|-------|-------|--------------------------------------|-------|-------|-------|-------|-------|
| RPL10     | 6.69                                  | 6.23  | 5.83  | 7.94  | 8.10  | 7.95  | 4.83                                 | 4.71  | 5.05  | 7.53  | 7.56  | 7.34  |
| MYLIP     | 4.26                                  | 4.09  | 4.36  | 6.47  | 5.79  | 6.01  | 4.09                                 | 4.15  | 3.91  | 5.90  | 6.53  | 6.12  |
| C1orf66   | 4.21                                  | 4.31  | 4.18  | 4.83  | 4.75  | 4.73  | 4.37                                 | 4.38  | 4.13  | 5.04  | 5.09  | 5.10  |
| ZNF226    | 5.22                                  | 5.06  | 5.14  | 6.74  | 6.86  | 6.65  | 5.43                                 | 5.66  | 5.23  | 6.58  | 7.21  | 7.10  |
| NA        | 5.65                                  | 6.75  | 6.53  | 9.61  | 9.21  | 9.49  | 6.19                                 | 5.67  | 5.60  | 8.75  | 8.82  | 9.12  |
| UQCRB     | 11.50                                 | 11.38 | 11.43 | 12.07 | 12.14 | 12.13 | 11.69                                | 11.81 | 11.82 | 12.13 | 12.22 | 12.17 |
| EFEMP2    | 4.53                                  | 4.67  | 4.67  | 6.39  | 6.21  | 6.45  | 4.59                                 | 4.47  | 4.12  | 6.76  | 7.00  | 7.01  |
| AIMP1     | 8.87                                  | 9.16  | 8.93  | 9.67  | 9.81  | 9.80  | 8.84                                 | 8.44  | 8.84  | 10.01 | 10.15 | 10.07 |
| PHF3      | 7.46                                  | 7.38  | 7.13  | 8.54  | 8.85  | 8.52  | 7.15                                 | 7.38  | 6.86  | 8.92  | 9.08  | 8.67  |
| FHL3      | 3.20                                  | 3.19  | 3.15  | 3.41  | 3.40  | 3.34  | 3.01                                 | 3.07  | 3.03  | 3.49  | 3.48  | 3.48  |
| IRS2      | 9.07                                  | 9.22  | 9.35  | 10.70 | 10.53 | 10.65 | 8.76                                 | 8.94  | 8.64  | 10.34 | 10.28 | 10.10 |
| N4BP2L2   | 4.42                                  | 5.71  | 5.47  | 8.02  | 7.67  | 7.80  | 4.86                                 | 4.68  | 4.66  | 8.15  | 8.43  | 8.09  |
| PARP6     | 5.16                                  | 5.33  | 5.17  | 6.52  | 6.18  | 6.64  | 5.11                                 | 4.93  | 4.86  | 6.65  | 6.86  | 6.91  |
| MORC2     | 7.25                                  | 7.36  | 7.02  | 8.34  | 8.39  | 8.57  | 6.69                                 | 6.53  | 6.59  | 7.89  | 8.35  | 8.41  |
| C17orf48  | 5.88                                  | 6.61  | 6.60  | 8.62  | 8.73  | 8.51  | 5.46                                 | 5.49  | 5.03  | 7.90  | 8.36  | 8.33  |
| IRS2      | 4.60                                  | 4.64  | 4.72  | 6.59  | 6.35  | 6.67  | 4.30                                 | 4.26  | 4.49  | 6.25  | 6.27  | 6.07  |
| ZNF83     | 4.98                                  | 5.63  | 5.47  | 8.72  | 7.91  | 8.56  | 5.05                                 | 5.45  | 5.15  | 8.49  | 8.36  | 8.83  |
| AKAP9     | 2.83                                  | 3.02  | 2.79  | 5.20  | 5.27  | 5.21  | 2.48                                 | 2.88  | 3.03  | 4.58  | 4.58  | 5.19  |
| HIST1H2BG | 3.87                                  | 4.51  | 3.37  | 7.83  | 7.80  | 7.42  | 5.39                                 | 4.80  | 4.33  | 8.10  | 7.89  | 8.24  |
| C19orf53  | 8.14                                  | 8.11  | 8.33  | 9.03  | 8.93  | 8.79  | 7.85                                 | 7.81  | 7.90  | 8.81  | 8.92  | 8.77  |
| UQCRC2    | 10.19                                 | 10.30 | 10.14 | 10.87 | 10.95 | 10.97 | 10.02                                | 10.05 | 9.78  | 10.97 | 10.85 | 11.10 |
| GOLGA8A   | 7.71                                  | 8.79  | 8.36  | 10.82 | 10.50 | 10.71 | 8.26                                 | 7.72  | 8.15  | 10.92 | 11.08 | 10.54 |
| RNASE4    | 2.91                                  | 3.08  | 3.08  | 4.76  | 4.71  | 4.64  | 2.81                                 | 2.75  | 2.89  | 4.74  | 4.45  | 4.04  |
| CCBL2     | 7.35                                  | 7.70  | 7.64  | 8.58  | 8.64  | 8.44  | 7.12                                 | 7.36  | 7.10  | 8.83  | 8.62  | 8.63  |
| TIPARP    | 6.85                                  | 6.76  | 7.25  | 8.87  | 9.06  | 8.79  | 4.89                                 | 5.65  | 5.40  | 8.63  | 8.67  | 8.77  |
| TAF1D     | 4.75                                  | 4.81  | 4.55  | 7.11  | 6.97  | 6.65  | 4.29                                 | 4.26  | 4.57  | 6.91  | 7.13  | 7.29  |
| SPSB3     | 3.95                                  | 4.20  | 4.16  | 5.03  | 4.87  | 4.76  | 3.85                                 | 4.12  | 3.84  | 5.13  | 5.10  | 5.08  |
| VGLL4     | 4.97                                  | 5.69  | 5.46  | 8.64  | 8.26  | 8.11  | 5.96                                 | 5.87  | 6.23  | 8.64  | 8.74  | 8.56  |
| ZNHIT3    | 7.64                                  | 7.75  | 7.74  | 9.40  | 9.29  | 8.84  | 6.96                                 | 7.47  | 7.38  | 9.23  | 9.26  | 9.38  |
| SFRS8     | 3.83                                  | 3.98  | 3.80  | 4.97  | 5.08  | 5.08  | 3.68                                 | 3.70  | 3.92  | 5.13  | 5.17  | 5.25  |
|           | <b>M21L (<math>\alpha v^-</math>)</b> |       |       |       |       |       | <b>M21 (<math>\alpha v^+</math>)</b> |       |       |       |       |       |



| <b>Pattern 10</b> | <b>2D</b>         |       |           | <b>3D</b> |           |       | <b>2D</b>        |           |       | <b>3D</b> |       |       |
|-------------------|-------------------|-------|-----------|-----------|-----------|-------|------------------|-----------|-------|-----------|-------|-------|
| CAPN3             | 9.94              | 10.08 | 9.94      | 9.80      | 9.67      | 9.44  | 8.95             | 9.16      | 9.62  | 7.19      | 7.28  | 6.56  |
| PTPLA             | 10.44             | 10.25 | 10.40     | 9.81      | 9.61      | 10.04 | 10.09            | 10.09     | 9.95  | 8.23      | 8.28  | 8.46  |
| DNAJC13           | 9.42              | 9.20  | 9.37      | 8.88      | 9.02      | 9.11  | 9.11             | 9.01      | 9.24  | 8.21      | 8.19  | 8.12  |
|                   | <b>M21L (av-)</b> |       |           |           |           |       | <b>M21 (av+)</b> |           |       |           |       |       |
| <b>Pattern 11</b> | <b>2D</b>         |       | <b>3D</b> |           | <b>2D</b> |       |                  | <b>3D</b> |       |           |       |       |
| ATXN10            | 11.28             | 11.16 | 11.07     | 10.83     | 10.79     | 10.65 | 10.43            | 10.18     | 10.43 | 9.98      | 9.83  | 9.81  |
| RPS12             | 13.43             | 13.38 | 13.44     | 13.52     | 13.49     | 13.57 | 13.13            | 13.10     | 13.04 | 13.28     | 13.19 | 13.25 |
| ID4               | 8.83              | 9.97  | 9.60      | 9.88      | 9.40      | 10.17 | 5.66             | 5.61      | 6.75  | 5.28      | 5.00  | 5.18  |
| CYLD              | 3.77              | 3.78  | 3.82      | 3.98      | 3.91      | 3.96  | 3.07             | 3.01      | 3.07  | 3.54      | 3.54  | 3.32  |
| SUN2              | 5.16              | 5.33  | 5.38      | 5.60      | 5.55      | 5.47  | 4.77             | 4.77      | 4.80  | 4.16      | 4.34  | 4.27  |
| EPB41L3           | 9.19              | 9.49  | 9.13      | 9.22      | 9.12      | 9.12  | 8.16             | 7.86      | 8.12  | 7.00      | 6.86  | 7.27  |
| PRDX6             | 10.51             | 10.60 | 10.71     | 10.78     | 10.80     | 10.68 | 9.10             | 9.31      | 9.32  | 9.88      | 9.97  | 9.76  |
| NA                | 6.66              | 7.04  | 6.99      | 7.26      | 7.06      | 6.90  | 4.92             | 4.64      | 4.87  | 4.95      | 4.53  | 5.01  |
| NEFL              | 6.89              | 6.93  | 6.80      | 6.66      | 6.59      | 6.38  | 5.03             | 4.76      | 4.96  | 4.20      | 4.80  | 4.17  |
|                   | <b>M21L (av-)</b> |       |           |           |           |       | <b>M21 (av+)</b> |           |       |           |       |       |
| <b>Pattern 12</b> | <b>2D</b>         |       |           | <b>3D</b> |           |       | <b>2D</b>        |           |       | <b>3D</b> |       |       |
| UTP18             | 9.61              | 9.68  | 9.32      | 8.10      | 7.88      | 8.09  | 9.85             | 10.03     | 10.08 | 9.37      | 9.45  | 9.20  |
| APOC2             | 5.49              | 5.79  | 5.86      | 3.92      | 4.16      | 4.08  | 6.44             | 5.91      | 5.80  | 4.08      | 4.02  | 4.23  |
| COX5B             | 12.49             | 12.23 | 12.35     | 11.45     | 11.57     | 11.34 | 12.86            | 12.75     | 12.87 | 11.97     | 12.04 | 11.90 |
| C17orf42          | 5.96              | 6.06  | 5.95      | 5.26      | 5.15      | 5.13  | 5.49             | 5.61      | 5.70  | 5.03      | 5.02  | 4.88  |
| DCT               | 11.72             | 11.56 | 11.45     | 10.61     | 10.22     | 10.82 | 11.74            | 11.93     | 12.20 | 10.13     | 9.87  | 9.89  |
| EIF4EBP1          | 8.91              | 8.74  | 8.81      | 6.84      | 7.37      | 7.22  | 8.80             | 8.80      | 9.24  | 8.03      | 8.09  | 8.14  |
| ITGB3             | 7.19              | 7.97  | 7.78      | 4.28      | 4.38      | 4.02  | 7.17             | 7.24      | 7.14  | 4.27      | 3.63  | 3.41  |
| DUSP14            | 8.30              | 8.56  | 8.52      | 6.56      | 6.57      | 6.68  | 7.72             | 8.00      | 8.04  | 6.94      | 6.64  | 7.19  |
| PHACTR2           | 4.11              | 4.00  | 4.23      | 3.02      | 2.93      | 2.72  | 3.62             | 3.78      | 3.70  | 2.95      | 2.97  | 2.93  |
| ACTB              | 11.70             | 11.75 | 11.99     | 10.56     | 10.48     | 10.51 | 11.15            | 11.42     | 11.66 | 10.24     | 10.16 | 9.92  |
| ADAM9             | 9.57              | 9.47  | 9.51      | 7.62      | 7.67      | 7.86  | 9.72             | 9.92      | 10.18 | 8.05      | 7.72  | 8.08  |
| COX5B             | 11.99             | 11.84 | 12.06     | 10.90     | 11.13     | 10.62 | 12.28            | 12.39     | 12.38 | 11.43     | 11.52 | 11.33 |
| TRAK2             | 9.01              | 9.16  | 8.68      | 7.03      | 6.40      | 6.62  | 8.52             | 8.33      | 8.90  | 6.42      | 5.92  | 6.53  |
| ST3GAL5           | 9.62              | 10.04 | 9.82      | 8.18      | 7.79      | 7.48  | 10.28            | 10.33     | 10.37 | 9.02      | 8.75  | 8.40  |

|          |       |       |       |       |       |       |       |       |       |       |       |       |
|----------|-------|-------|-------|-------|-------|-------|-------|-------|-------|-------|-------|-------|
| ITGB3    | 9.63  | 10.36 | 10.31 | 5.46  | 4.25  | 4.23  | 9.84  | 9.80  | 9.58  | 6.59  | 5.74  | 4.86  |
| OSTM1    | 9.67  | 9.59  | 9.39  | 8.29  | 8.32  | 8.75  | 9.39  | 9.30  | 9.50  | 7.62  | 7.20  | 7.16  |
| ACTB     | 13.18 | 12.82 | 13.03 | 11.82 | 11.77 | 11.97 | 12.77 | 12.93 | 13.25 | 11.63 | 11.35 | 11.49 |
| GNPTAB   | 11.44 | 11.25 | 11.21 | 10.40 | 10.60 | 10.82 | 11.39 | 11.23 | 11.35 | 10.13 | 10.06 | 10.06 |
| C12orf5  | 7.79  | 7.57  | 7.45  | 4.87  | 4.66  | 4.86  | 7.53  | 7.68  | 8.04  | 5.29  | 4.74  | 4.79  |
| DCT      | 9.58  | 9.74  | 9.74  | 7.73  | 7.68  | 8.13  | 9.51  | 10.08 | 9.93  | 7.39  | 7.20  | 6.41  |
| QDPR     | 9.89  | 10.05 | 10.08 | 7.92  | 7.99  | 8.19  | 10.04 | 10.29 | 10.45 | 8.10  | 7.64  | 7.47  |
| LGALS3   | 13.05 | 12.99 | 13.12 | 12.44 | 12.38 | 12.55 | 12.86 | 12.95 | 13.00 | 12.29 | 12.25 | 12.24 |
| ATP1B3   | 11.20 | 11.11 | 11.22 | 9.62  | 9.71  | 9.58  | 10.72 | 11.06 | 11.37 | 9.10  | 9.13  | 9.33  |
| MAD2L1BP | 4.64  | 4.39  | 4.47  | 3.74  | 3.80  | 3.86  | 4.68  | 4.54  | 4.69  | 3.74  | 3.43  | 3.39  |
| TFRC     | 12.06 | 12.41 | 12.18 | 10.59 | 10.80 | 10.81 | 12.48 | 12.38 | 12.42 | 11.12 | 10.95 | 11.48 |
| CCNH     | 9.12  | 9.32  | 9.11  | 7.82  | 8.10  | 7.78  | 9.29  | 9.25  | 9.30  | 8.21  | 8.44  | 8.44  |
| ANXA5    | 11.75 | 11.68 | 11.85 | 11.04 | 11.13 | 11.11 | 11.69 | 11.74 | 11.75 | 10.95 | 10.86 | 10.80 |
| ACTB     | 13.05 | 12.90 | 13.08 | 11.71 | 11.99 | 12.16 | 12.78 | 12.96 | 13.07 | 11.67 | 11.45 | 11.59 |
| SEPT11   | 6.41  | 6.55  | 6.23  | 4.61  | 5.00  | 4.47  | 6.28  | 6.11  | 6.47  | 4.18  | 4.64  | 4.26  |
| WDR61    | 10.41 | 10.22 | 10.28 | 9.49  | 9.28  | 9.32  | 10.30 | 10.18 | 10.43 | 9.43  | 9.07  | 9.24  |
| ACTB     | 13.06 | 12.93 | 13.10 | 11.81 | 12.08 | 12.26 | 12.89 | 13.04 | 13.06 | 11.76 | 11.51 | 11.68 |
| GSTO1    | 11.20 | 11.36 | 11.52 | 10.37 | 10.38 | 10.25 | 11.44 | 11.34 | 11.43 | 10.15 | 10.29 | 9.96  |
| HAS2     | 8.28  | 8.03  | 8.09  | 6.18  | 6.39  | 6.09  | 8.17  | 8.27  | 8.19  | 6.32  | 6.74  | 6.42  |
| SH2B3    | 9.55  | 9.47  | 9.46  | 6.89  | 6.31  | 6.14  | 9.62  | 9.34  | 9.55  | 6.63  | 6.30  | 6.51  |
